# Supplementary material
Source: HighWire-hosted journal article supplement (https://erj.ersjournals.com/highwire/filestream/113112/field_highwire_adjunct_files/4/Supp_figure_5.pdf)

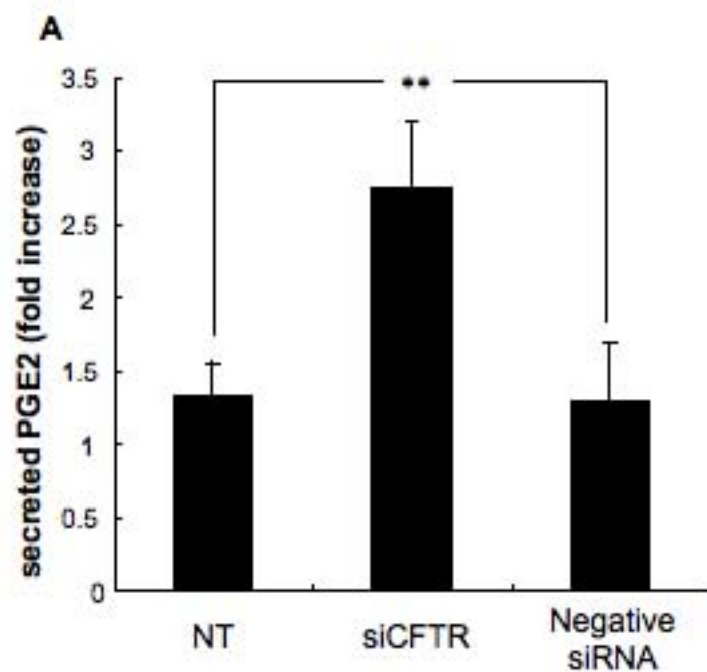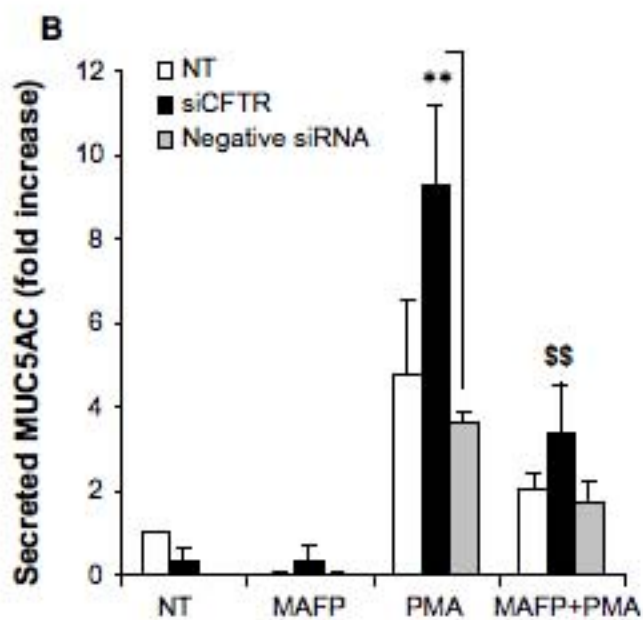

Supplementary data : Figure 5

Supplement: Supp_figure_5.pdf [file Supp_figure_5.pdf]
